# Supplementary material for: Novel role of the muskelin–RanBP9 complex as a nucleocytoplasmic mediator of cell morphology regulation
Source: PubMed Central journal article supplement — J Cell Biol. 2008 Aug 25;182(4):727–39. doi: 10.1083/jcb.200801133 (PMC2518711; doi:10.1083/jcb.200801133), 2008-08-25
Supplement: jcb.200801133_4.pdf [file jcb.200801133_4.pdf]

Table S1. **Oligonucleotide primers used to prepare the domain or point mutant constructs**

| <b>Oligonucleotide</b>        | <b>Sequence</b>                          |
|-------------------------------|------------------------------------------|
| <b>Mouse muskelin domains</b> |                                          |
| Nterm-F1                      | 5' GGTGCTGACAAGATGGCG 3'                 |
| CtermR1                       | 5' CGTGACGGTACCTACAGTGTGATCAGGTC 3'      |
| Lis-R1                        | 5' CTAGGGATCCTTACAGTGCAATCTTGGT 3'       |
| CTHL-R                        | 5' ATGCATGGATCCTAGCTCTTAGGGAATAATCTG 3'  |
| ΔC35-R                        | 5' CTAGGGTACCATCCACATCTGAAAAGCCTAGA 3'   |
| Lis-F1                        | 5' CTAGGAATTCAGCAAGTACCGTGAACA 3'        |
| CTLH-F                        | 5' CTAGGAATTCATCCAATGTTGACAGAT 3'        |
| Kelch-F                       | 5' GGCTTAGAATTCAGGAGTATAAGCCA 3'         |
| C35-F1                        | 5' GTACGAATTCAGATGTGGATCATACC 3'         |
| LisHAA-F                      | 5' CGCCTTTGCCTAGCAGCCTTCAGACAACAT 3'     |
| LisHAA-R                      | 5' ATGTTGTCTGAAGGCTGCTAGGCAAGGCG 3'      |
| T723A-F                       | 5' TCCTGACAGCATGGCTCCTCTAAAGGCAAC 3'     |
| T723A-R                       | 5' GTTGCCTTTAGGAGGAGCCATGCTGTCAGGA 3'    |
| T723D-F                       | 5' TCCTGACAGCATGGATCCTCTAAAGGCAAC 3'     |
| T723D-R                       | 5' GTTGCCTTTAGGAGGATCCATGCTGTCAGGA 3'    |
| <b>Vinculin constructs</b>    |                                          |
| Vin-F                         | 5' CGCGTCGTTTCCTTATTC 3'                 |
| Vin-R                         | 5' GTACGTTAACCTGATACCATGGGGTCTT 3'       |
| MKLis-F2                      | 5' GTACGTTAACAAGTACCGTGAACAGGAA 3'       |
| MKLis-R2                      | 5' CTAGTCTAGATTACAGTGCAATCTTGGTT 3'      |
| <b>RanBP domains</b>          |                                          |
| SPRY-F                        | 5' CTAGAAGCTTGCTCTGGTGGCGGGCAGCA 3'      |
| CRA-R                         | 5' GCATGGTACCCTAATGTAGGTAGTCTTC 3'       |
| Lis-F                         | 5' GATCAAGCTTGATCGAGAAGGAGAATGGCAG 3'    |
| Lis-R                         | 5' GCATTAGAACTCAGGTCTGGTCTGTAGA 3'       |
| H-F                           | 5' GATCAAGCTTGCTCCATTAAGAATAGACAAAGA 3'  |
| H-R                           | 5' GATCGGATCCTTAGCCTCCCAAACATCGTACTTC 3' |
| u-R                           | 5' GATCGGATCCTTACTGACTCCTCCACACAACAG 3'  |
| CRA-F                         | 5' GATCGAATTCAGTCAAGCCGCCATAGAAAGA 3'    |

All oligonucleotides were synthesized by Sigma-Aldrich. Oligonucleotides used for mutagenesis were HPLC purified.
